# Supplementary material for: iEdgeDTA: integrated edge information and 1D graph convolutional neural networks for binding affinity prediction
Source: Royal Society of Chemistry journal article supplement (doi:10.1039/d3ra03796g), 2023-01-01

# iEdgeDTA: integrated edge information and 1D graph convolutional neural networks for binding affinity prediction

## Supplementary information

**Table S1**

Detailed drug feature representation

| Name                                         | Definition                                                            | Size | Range of value                                                                                                                                                                                                                                         |
|----------------------------------------------|-----------------------------------------------------------------------|------|--------------------------------------------------------------------------------------------------------------------------------------------------------------------------------------------------------------------------------------------------------|
| <b>Node feature (66)</b>                     |                                                                       |      |                                                                                                                                                                                                                                                        |
| Atom symbol (char)                           | Atomic symbol                                                         | 18   | ["H", "B", "C", "N", "O", "F", "Mg", "Si", "P", "S", "Cl", "Cu", "Zn", "Se", "Br", "Sn", "I", and Unknown]                                                                                                                                             |
| Atomic chiral tag (type)                     | Type of chirality                                                     | 4    | [<br>CHI_UNSPECIFIED (chirality that hasn't been specified),<br>CHI_TETRAHEDRAL_CW (tetrahedral: clockwise rotation (SMILES @@)),<br>CHI_TETRAHEDRAL_CCW (tetrahedral: counter-clockwise rotation),<br>CHI_OTHER (unrecognized type of chirality)<br>] |
| Degree of atom (integer)                     | Number of directly-bonded neighbors in the molecule including Hs      | 8    | from 1 to 7, and unknown if degree > 7                                                                                                                                                                                                                 |
| Number of formal charges (integer)           | Number of formal charges in the molecule                              | 11   | from -5 to 5                                                                                                                                                                                                                                           |
| Number of explicit and implicit Hs (integer) | Total number of Hs (implicit and explicit) that this atom is bound to | 7    | from 0 to 6                                                                                                                                                                                                                                            |
| Number of radical electron (integer)         | Number of unpaired electrons for an atom (radical)                    | 8    | from 0 to 7                                                                                                                                                                                                                                            |
| Atom hybridization (type)                    | Orbital hybridisation, introduced to explain molecular structure      | 8    | [UNSPECIFIED, S, SP, SP2, SP3, SP3D, SP3D2, OTHER]                                                                                                                                                                                                     |

|                                  |                                                                            |   |                                                                                       |
|----------------------------------|----------------------------------------------------------------------------|---|---------------------------------------------------------------------------------------|
| Is aromatic (bool)               | Whether the atom is aromatic (molecule has cyclic; ring-shaped structures) | 1 | 1 if true, 0 if false                                                                 |
| Is in ring (bool)                | Whether the atom is in an aromatic ring                                    | 1 | 1 if true, 0 if false                                                                 |
| <b>Edge Feature (18)</b>         |                                                                            |   |                                                                                       |
| Bond type (type)                 | A type of bond between atoms                                               | 4 | [SINGLE, DOUBLE, TRIPLE, AROMATIC]                                                    |
| Bond direction (type)            | The direction of the bond                                                  | 7 | [NONE, BEGIN_WEDGE, BEGIN_DASH, END_DOWN_RIGHT, END_UP_RIGHT, EITHER_DOUBLE, UNKNOWN] |
| Bond stereo configuration (type) | The stereo configuration of the bond                                       | 6 | [STEREONONE, STEREOANY, STEREOZ, STEREOE, STEREOCIS, STEREOTRANS]                     |
| Is bond conjugated (bool)        | Whether the bond is considered to be conjugated                            | 1 | 1 if true, 0 if false                                                                 |

## Table S2

Performance of iEdgeDTA evaluated in the same setting as GraphDTA, DGraphDTA, WGNN and MGraphDTA; all results of GraphDTA, DGraphDTA, WGNN and MGraphDTA were obtained from their original publications.

| Dataset | Model          | MSE          | CI           |
|---------|----------------|--------------|--------------|
| Davis   | GraphDTA       | 0.229        | 0.893        |
|         | DGraphDTA      | 0.202        | 0.904        |
|         | WGNN           | 0.208        | 0.898        |
|         | MGraphDTA      | 0.207        | 0.900        |
|         | Our (iEdgeDTA) | <b>0.195</b> | <b>0.906</b> |
| KIBA    | GraphDTA       | 0.139        | 0.891        |
|         | DGraphDTA      | 0.126        | <b>0.904</b> |
|         | WGNN           | 0.130        | 0.900        |
|         | MGraphDTA      | 0.128        | 0.902        |
|         | Our (iEdgeDTA) | <b>0.124</b> | 0.897        |

## Figure S1

Dataset distribution

Davis: Around 25% (109/442) of the proteins contain more than 1024 amino acids.

KIBA: Around 20% (42/229) of the proteins contain more than 1024 amino acids.

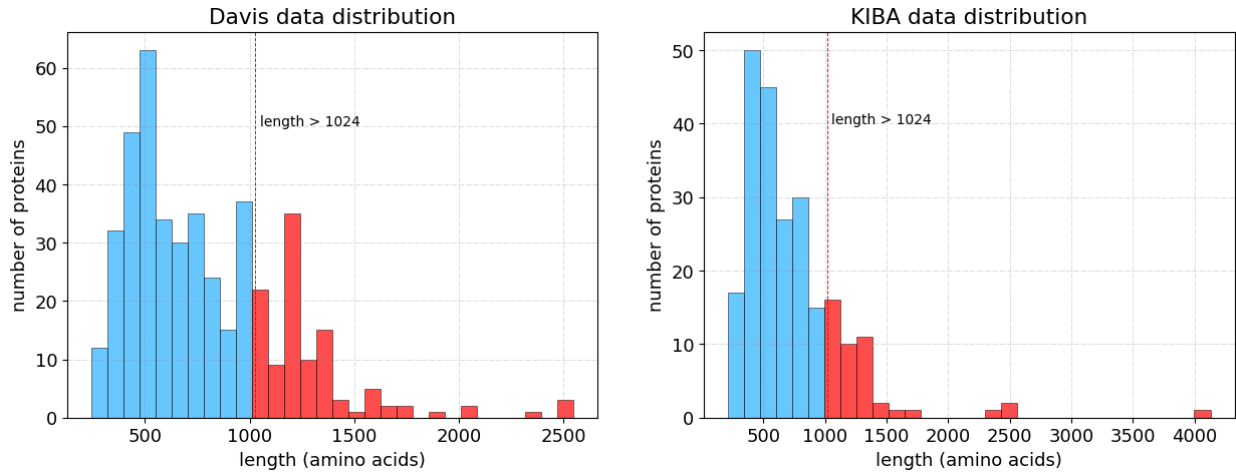

## Figure S2

Cross-validation and testing; the model that performed best in the cross-validation was selected, and the weight of each cross-validation fold of the selected model was used to evaluate the performance with the independence test set.

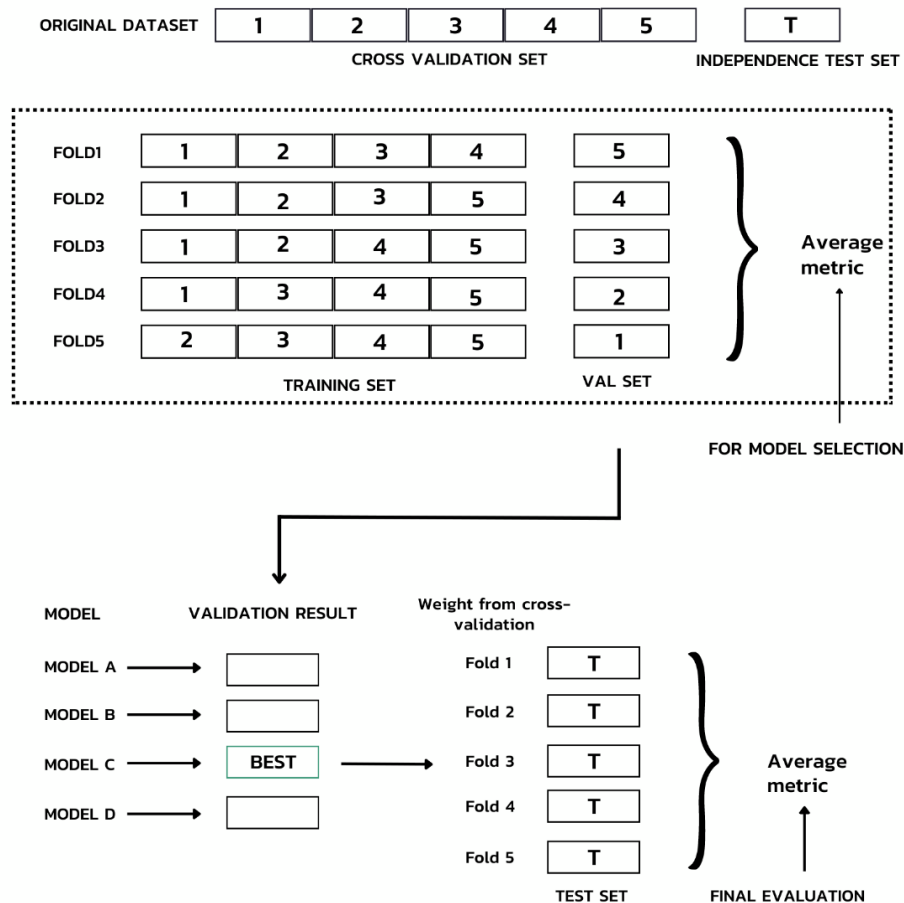

### Figure S3

Performance of various dropout probabilities on Davis's five-fold cross validation set, where the error bar indicates the standard deviation.

MSE : Mean squared error (lower better)

CI: Concordance index (higher better)

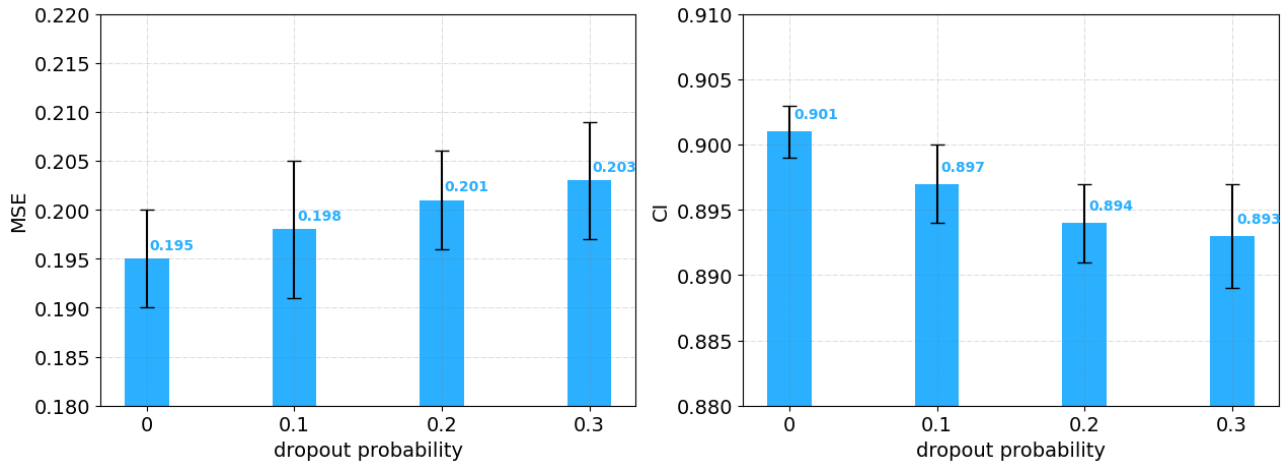

Supplement: d3ra03796g1.pdf [file d3ra03796g1.pdf]
